# Supplementary material
Source: PubMed Central journal article supplement (PMC3982387)
Supplement: NIHMS566247-supplement-Supplementary_Data.pdf [file NIHMS566247-supplement-Supplementary_Data.pdf]

# Phosphonated Trityl Probe for Concurrent *In vivo* Tissue Oxygen and pH Monitoring Using EPR-based Techniques

*Ilirian Dhimitruka,<sup>†</sup> Andrey A. Bobko,<sup>†</sup> Timothy D. Eubank<sup>†</sup>, Denis A. Komarov,<sup>§</sup> and Valery V.*

*Khramtsov<sup>\*†</sup>*

<sup>†</sup>Dorothy M. Davis Heart & Lung Research Institute and Division of Pulmonary, Allergy, Critical Care & Sleep Medicine, Department of Internal Medicine, The Ohio State University, Columbus, OH 43210, United States

<sup>§</sup>Vorozhtsov Institute of Organic Chemistry, Novosibirsk 630090, Russia

[valery.khramtsov@osumc.edu](mailto:valery.khramtsov@osumc.edu)

Table of content:

|     |                                                                                          |     |
|-----|------------------------------------------------------------------------------------------|-----|
| 1.  | Acid-base equilibrium for p <sub>n</sub> TAM probes                                      | S2  |
| 2.  | X-band EPR spectra of p <sub>1</sub> TAM-H probe                                         | S2  |
| 3.  | X-band EPR spectra and titration curves of p <sub>2</sub> TAM-H and p <sub>2</sub> TAM-D | S3  |
| 4.  | Spectral parameters and dissociation constants of p <sub>2</sub> TAM-D                   | S4  |
| 5.  | Concentration self-broadening of p <sub>1</sub> TAM-D                                    | S4  |
| 6.  | Partition coefficients for p <sub>1</sub> TAM-D probe                                    | S4  |
| 7.  | Acid-induced aggregation of p <sub>n</sub> TAM-D and Finland TAM-D                       | S5  |
| 8.  | An exemplified analysis of in vivo L-band EPR spectra of p <sub>1</sub> TAM-D probe      | S6  |
| 9.  | Mass spectra of p <sub>1</sub> TAM and p <sub>2</sub> TAM probes                         | S7  |
| 10. | Literature cited                                                                         | S10 |

**Scheme S11.** The scheme of acid-base equilibrium for  $p_n$ TAM trityl radicals.  $pK_1^i$  and  $pK_2^i$  denote the  $pK_a$  values of first and second ionization constants for each ( $i = 1, 2, 3$ ) phosphonic acid residue;  $pK_c^i$  denote the  $pK_a$  values of ionization constants for each ( $i = 1, 2$ ) carboxylic acid residue of  $p_n$ TAM probes.

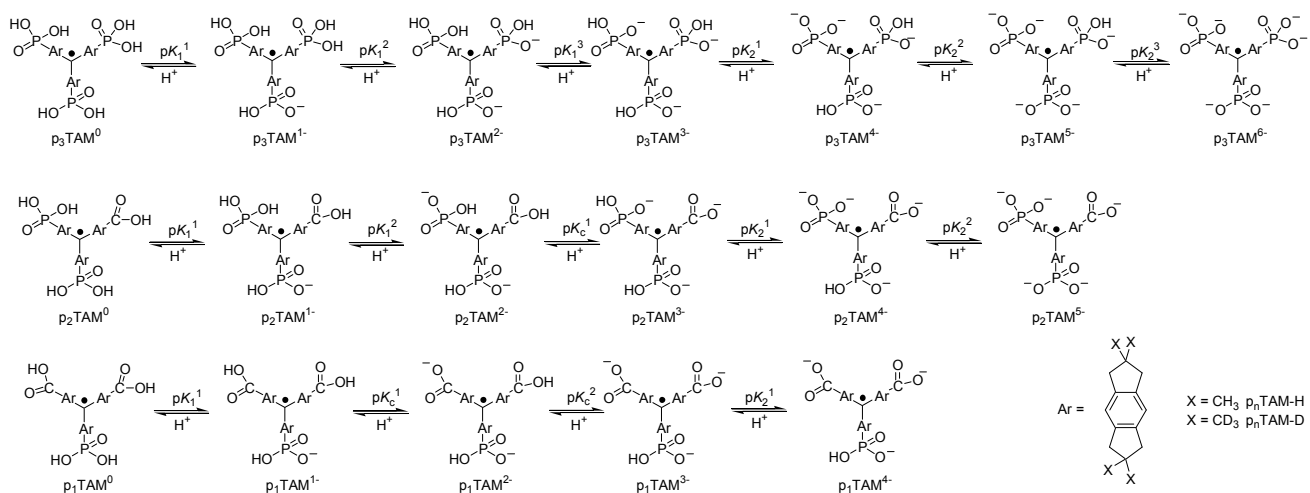

**X-band EPR spectra of  $p_1$ TAM-H,  $p_2$ TAM-H and  $p_2$ TAM-D at different pH values and titration curves for  $p_2$ TAM radicals**

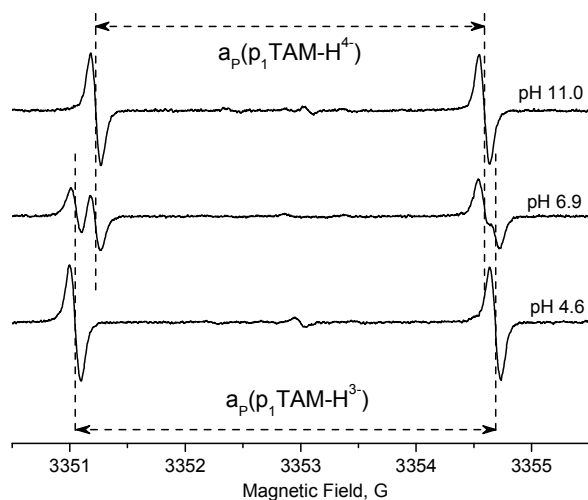

**Figure S11.** EPR spectra of 100  $\mu$ M  $p_1$ TAM-H solutions in 1 mM Na-phosphate buffer, 150 mM NaCl, measured at various pH values under nitrogen atmosphere and temperature 37 °C. X-Band EPR spectrometer settings: microwave power, 130  $\mu$ W; time constant, 20.48 ms; conversion time, 5 ms; sweep time, 20.48 s; modulation frequency, 10 kHz; modulation amplitude, 0.05 G; sweep width 5.5 G; number of points, 4096.

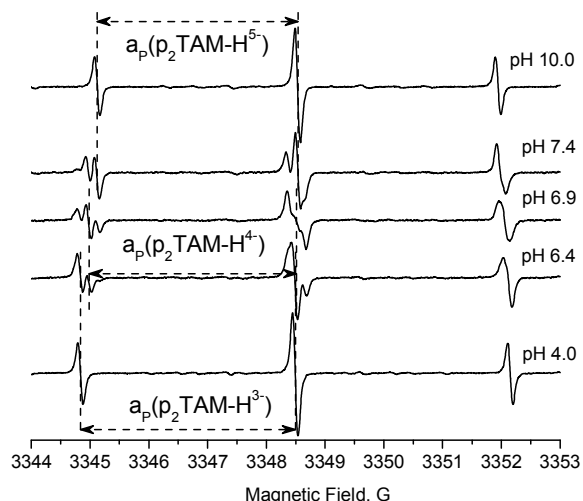

**Figure SI2.** X-band EPR spectra of 250  $\mu\text{M}$   $p_2\text{TAM-H}$  solutions in 1 mM Na-phosphate buffer, 150 mM NaCl, measured at various pH values under nitrogen atmosphere and temperature 37  $^\circ\text{C}$ . Spectrometer settings: microwave power, 130  $\mu\text{W}$ ; time constant, 20.48 ms; conversion time, 5 ms; sweep time, 20.48 s; modulation frequency, 10 kHz; modulation amplitude, 0.05 G; sweep width 10 G; number of points, 4096.

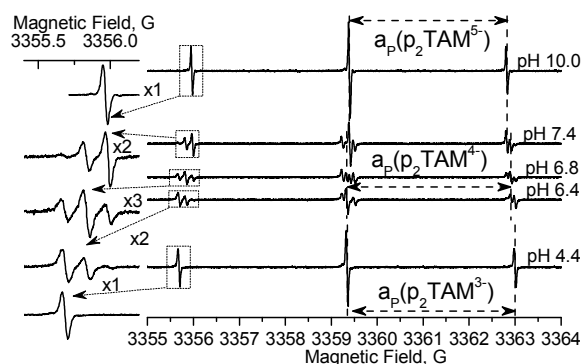

**Figure SI3.** X-band EPR spectra of 0.2 mM  $p_2\text{TAM-D}$  solutions in 1 mM Na-phosphate buffer, 150 mM NaCl, measured at various pHs under nitrogen atmosphere, at 37  $^\circ\text{C}$ . Spectrometer settings: microwave power, 40  $\mu\text{W}$ ; modulation frequency, 10 kHz; modulation amplitude, 0.02 G; number of points, 8192.

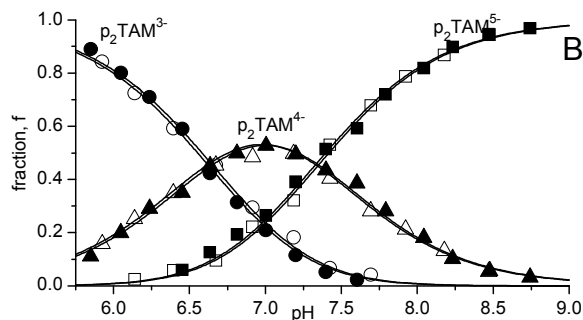

**Figure SI4.** The pH dependencies of fraction of the ionization states of diphosphonated  $p_2\text{TAMs}$  calculated from the corresponding EPR spectra (Figs. SI2 and SI1-3). The closed and open symbols denote the data obtained for  $p_2\text{TAM-D}$  and  $p_2\text{TAM-H}$ , correspondingly. The squares denote  $p_2\text{TAM}^{5-}$ , triangles denote  $p_2\text{TAM}^{4-}$  and circles denote  $p_2\text{TAM}^{3-}$  ionization states (See Scheme SI1). Solid lines represent the best fits using standard titration equations yielding  $pK_a$  values presented in the Table SI1.

**Table SII.** The  $pK_a$  Values and X-Band EPR Spectral Parameters for Different Ionization States of  $p_2$ TAM-D.

| Ionization State  | $pK_a$                  | $a_{p1}$ ( $PO_3^{2-}$ ), mG  | $a_{p2}$ ( $HPO_3^-$ ), mG      | $a_{p3}$ ( $H_2PO_3$ ), mG      | $\Delta H_{pp}$ , mG | $\Delta g$ , mG |
|-------------------|-------------------------|-------------------------------|---------------------------------|---------------------------------|----------------------|-----------------|
| $p_2$ TAM $^{5-}$ | $7.35 \pm 0.05$         | $3420 \pm 5$ (2) <sup>a</sup> | Na                              | na                              | $34 \pm 2$           | 0               |
| $p_2$ TAM $^{4-}$ | $6.65 \pm 0.05$         | $3420 \pm 5$ (1) <sup>a</sup> | $3660 \pm 5$ (1) <sup>a</sup>   | na                              | $37 \pm 2$           | $37 \pm 5$      |
| $p_2$ TAM $^{3-}$ | $\approx 2.6 \pm 0.3^b$ | na                            | $3660 \pm 5$ (2) <sup>a</sup>   | na                              | $42 \pm 2$           | $72 \pm 8$      |
| $p_2$ TAM $^{2-}$ | $\approx 1.3 \pm 0.3$   | na                            | $\approx 3650$ (2) <sup>a</sup> | na                              | $\approx 42$         | $\approx 72$    |
| $p_2$ TAM $^0$    |                         | na                            | Na                              | $\approx 3750$ (2) <sup>a</sup> | $\approx 42$         | $\approx 100$   |

<sup>a</sup> the values in parenthesis denote the number of phosphono groups.

<sup>b</sup> the  $pK_a$  value for carboxyl group.

### Concentration self broadening of $p_1$ TAM-D

Concentration-induced line self-broadening of TAM probes is one order of magnitude less than that of nitroxide probes<sup>1</sup> and is not an issue for low concentrations of the  $p$ TAM probes. However at high probe concentration line-broadening (see Fig.SI5) is observed.

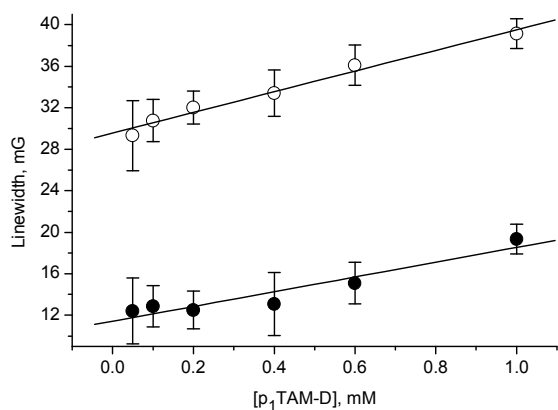

**Figure SI5.** The concentration dependence of Lorentz linewidths of  $p_1$ TAM $^{3-}$ ( $\circ$ ) and  $p_1$ TAM $^{4-}$ ( $\bullet$ ) components of  $p_1$ TAM-D probe. Line represents the best linear fit with the slopes of  $(10 \pm 1)$  mG/mM and  $(7 \pm 1)$  mG/mM, correspondingly. L-band EPR spectra were recorded in the presence of 150 mM NaCl and 1mM Na-phosphate buffer under anoxic conditions and temperature of 37 °C.

### Partition coefficients for $p_1$ TAM-D probe

To support high aqueous solubility of  $p_1$ TAM probe, we measured their partition coefficients in octanol/water solutions. The solutions of  $p_1$ TAM-D (200  $\mu$ M) in the presence of 0.1 M Na-phosphate buffer at various pHs in the range from 6.0 to 8.0 were vigorously mixed with equal volume of octanol for 5 min and allowed to stand for another 5 min until separation of the phases was completed. The values of the partition coefficient,  $K_p$ , were calculated as a ratio of the integral intensities of the EPR spectra of  $p_1$ TAM-D probe in octanol and aqueous phases, correspondingly. The spectrum of  $p_1$ TAM-D probe was found to be below detection limit at these pH values providing an upper limit of  $K_p$  value being  $< 0.001$ . For comparison,  $K_p$  values for deuterated Finland TAM-D probe was found to be equal to  $0.36 \pm 0.13$  (pH=6),  $0.02 \pm 0.01$  (pH=6.5) and  $\leq 0.003$  (pH=7). The data support superior aqueous solubility of the phosphonated compound.

### ***Solubility of $p_n$ TAMs at acidic pH***

The aggregation of Finland TAM in acidic solutions was previously reported<sup>2</sup>. An introduction of phosphono groups significantly extends the pH range of solubility of the  $p_n$ TAM probes (Fig. SI6) apparently due to low  $pK_a$  for the phosphonic acid dissociation ( $pK_{a1} \approx 1.3$ ), and therefore maintaining a negatively charged structure at any reasonable pH above pH 3.

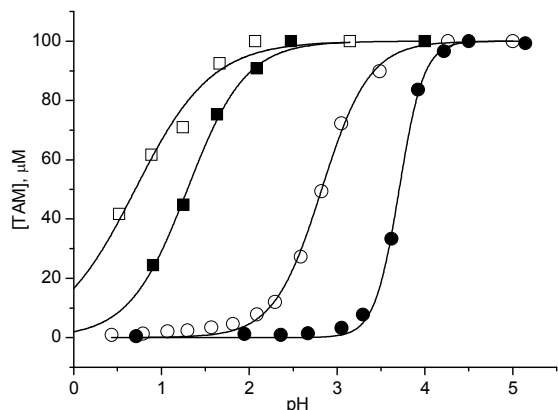

**Figure SI6.** The dependence of the EPR peak signal intensities of deuterated Finland TAM probe, TAM-D (●, 100  $\mu$ M),  $p_1$ TAM-D (○, 100  $\mu$ M),  $p_2$ TAM-D (■, 200  $\mu$ M), and  $p_3$ TAM-D (□, 200  $\mu$ M) on the pH of the sample. Lines represent the best fits using equation  $[TAM]_{pH} = [TAM]_0 - [TAM]_0 / (1 + 10^{(pH-pK_{agg})/q})$  yielding  $pK_{agg} = 3.7 \pm 0.05$ ,  $2.82 \pm 0.05$ ,  $1.30 \pm 0.05$  and  $0.70 \pm 0.05$ ; and  $q = 0.32$ ,  $0.63$ ,  $0.74$  and  $1$  for TAM-D,  $p_1$ TAM-D,  $p_2$ TAM-D, and  $p_3$ TAM-D, correspondingly. The samples were measured in the presence of 1 mM Na-phosphate buffer, 150 mM NaCl and temperature 37 °C.

### *An exemplified analysis of in vivo L-band EPR spectra of p<sub>1</sub>TAM-D probe*

Lineshape analysis of the EPR spectrum was performed as previously described<sup>3</sup> fitting experimental spectrum by rational approximation of Voigt function given by Hui *et al.*<sup>4</sup> The independent character of the signal intensities ratio and line broadenings provides dual pH & oxygen functionality, as illustrated below.

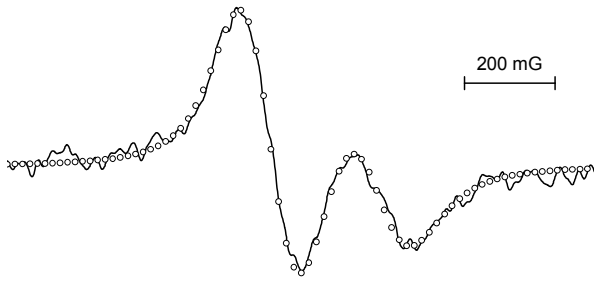

**Fig. SI7.** L-band EPR spectrum of high-field component of p<sub>1</sub>TAM-D probe injected into the mammary gland (0.5 mM, 10  $\mu$ l). Circles indicate simulated spectrum yielding the values of  $pO_2$  and pH equal to 54 mmHg and 7.14 pH units, correspondingly.

For the spectrum shown in Fig. SI7, the lineshape analysis yields:  $[p_1TAM^{4-}]/[p_1TAM^{3-}] = 1.73$  (which corresponds to pH 7.14); line distance between p<sub>1</sub>TAM<sup>4-</sup> and p<sub>1</sub>TAM<sup>3-</sup> lines, 115 mG (which corresponds to 1.4 mM buffer concentration, see Fig. 6B); and Lorentzian linewidths,  $L_{tot}(p_1TAM^{4-}) = 46$  mG and  $L_{tot}(p_1TAM^{3-}) = 53$  mG. Subtracting from the latter values the Lorentzian linewidths in deoxygenated 1.4 mM phosphate buffer,  $L_{buf}(p_1TAM^{4-}) = 21$  mG and  $L_{buf}(p_1TAM^{3-}) = 28$  mG (see calibration in Fig. 6A), we obtain oxygen-induced line broadenings,  $\Delta L_{ox}(p_1TAM^{4-}) = 25$  mG and  $\Delta L_{ox}(p_1TAM^{3-}) = 25$  mG. The latter corresponds to the oxygen partial pressure,  $pO_2 = 52$  mmHg (see calibration in Fig. 4). Note that concentration-induced line self-broadening is insignificant at low probe concentrations used. From our previous imaging studies of the membrane-impermeable extracellular probe<sup>5</sup> we should expect fast p<sub>1</sub>TAM-D distribution throughout the tissue of the mammary gland or tumor, therefore final concentration of the probe is about an order lower (50-100  $\mu$ M) than the threshold for self-broadening ( $\approx 400$   $\mu$ M, Fig. SI5).

# Display Report

## Analysis Info

Analysis Name D:\Data\Raw data\X082012B.d  
Method pos\_tune\_mid.m  
Sample Name #17271\_dFT-P1C2  
Comment W/Na Acetate

Acquisition Date 8/20/2012 9:55:49 AM

Operator BDAL@DE  
Instrument maXis 4G 20196

## Acquisition Parameter

|             |            |                       |            |                  |           |
|-------------|------------|-----------------------|------------|------------------|-----------|
| Source Type | ESI        | Ion Polarity          | Positive   | Set Nebulizer    | 0.3 Bar   |
| Focus       | Not active | Set Capillary         | 4500 V     | Set Dry Heater   | 180 °C    |
| Scan Begin  | 300 m/z    | Set End Plate Offset  | -500 V     | Set Dry Gas      | 4.0 l/min |
| Scan End    | 3000 m/z   | Set Collision Cell RF | 1200.0 Vpp | Set Divert Valve | Waste     |

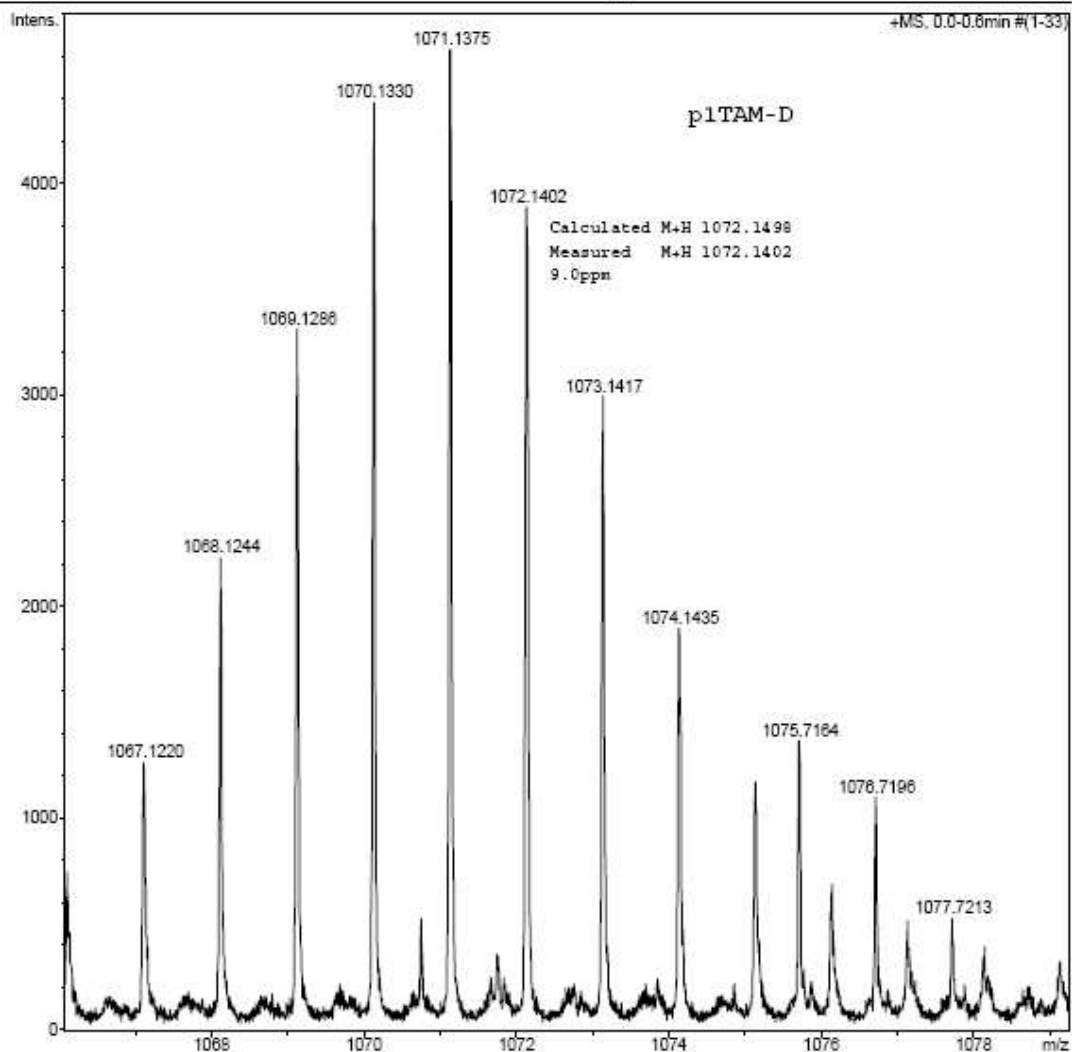

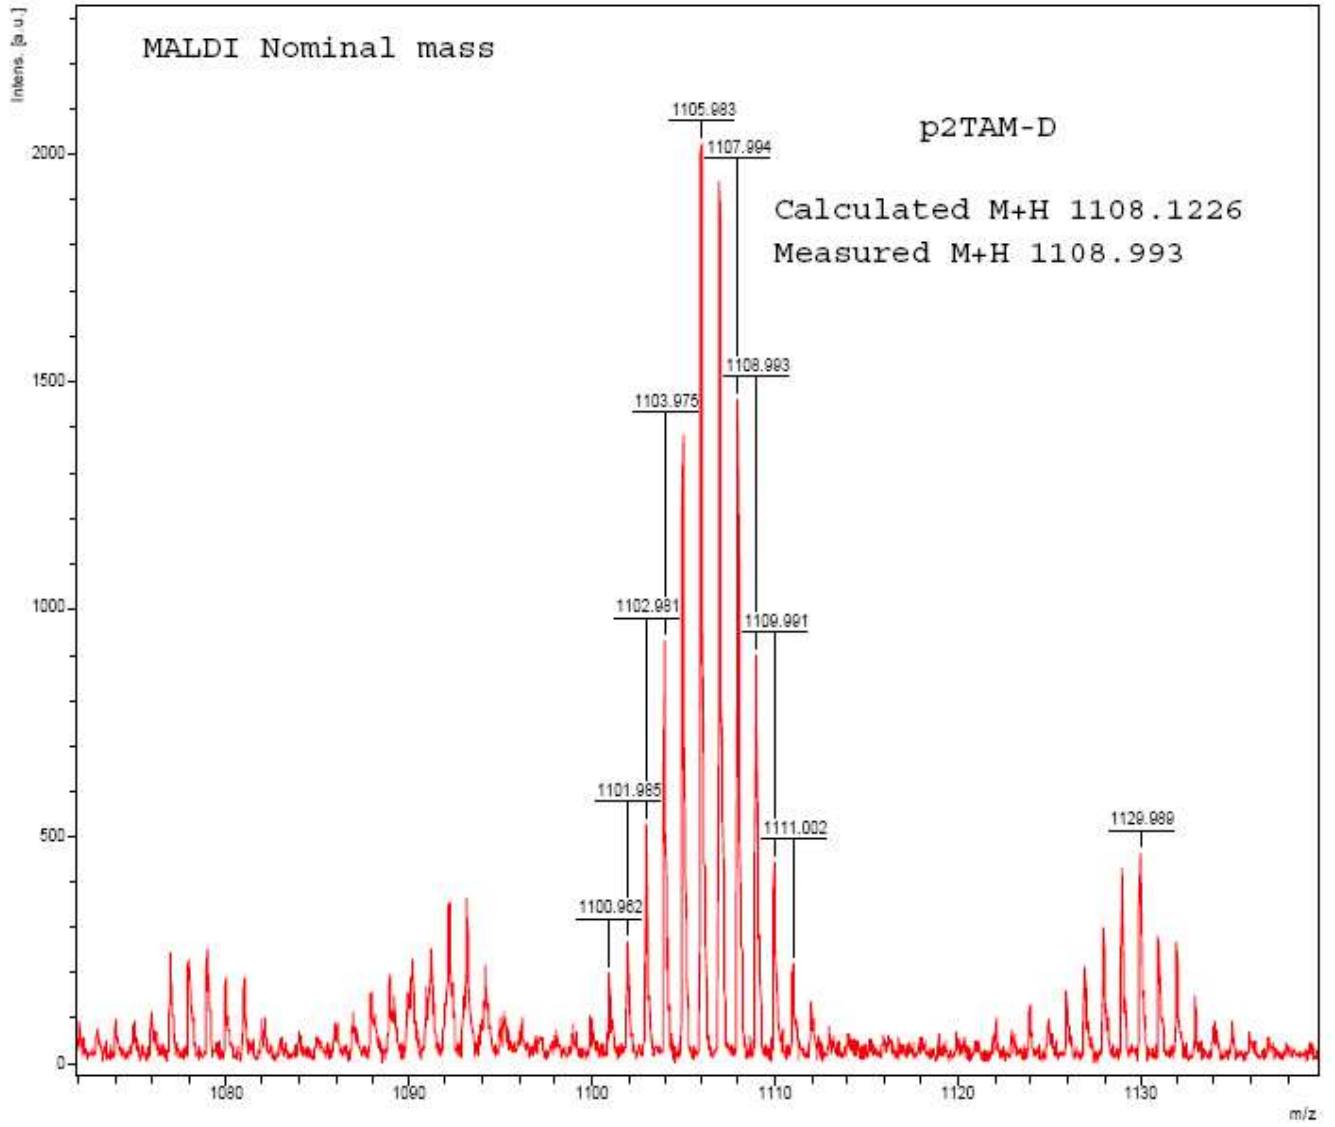



# Display Report

## Analysis Info

Analysis Name D:\Data\Raw data\X082012C.d  
Method pos\_tune\_mid.m  
Sample Name #17271\_FT-P1C1  
Comment W/Na Acetate

Acquisition Date 8/20/2012 9:59:20 AM

Operator BDAL@DE  
Instrument maXis 4G 20196

## Acquisition Parameter

|             |            |                       |            |                  |           |
|-------------|------------|-----------------------|------------|------------------|-----------|
| Source Type | ESI        | Ion Polarity          | Positive   | Set Nebulizer    | 0.3 Bar   |
| Focus       | Not active | Set Capillary         | 4500 V     | Set Dry Heater   | 180 °C    |
| Scan Begin  | 300 m/z    | Set End Plate Offset  | -500 V     | Set Dry Gas      | 4.0 l/min |
| Scan End    | 3000 m/z   | Set Collision Cell RF | 1200.0 Vpp | Set Divert Valve | Waste     |

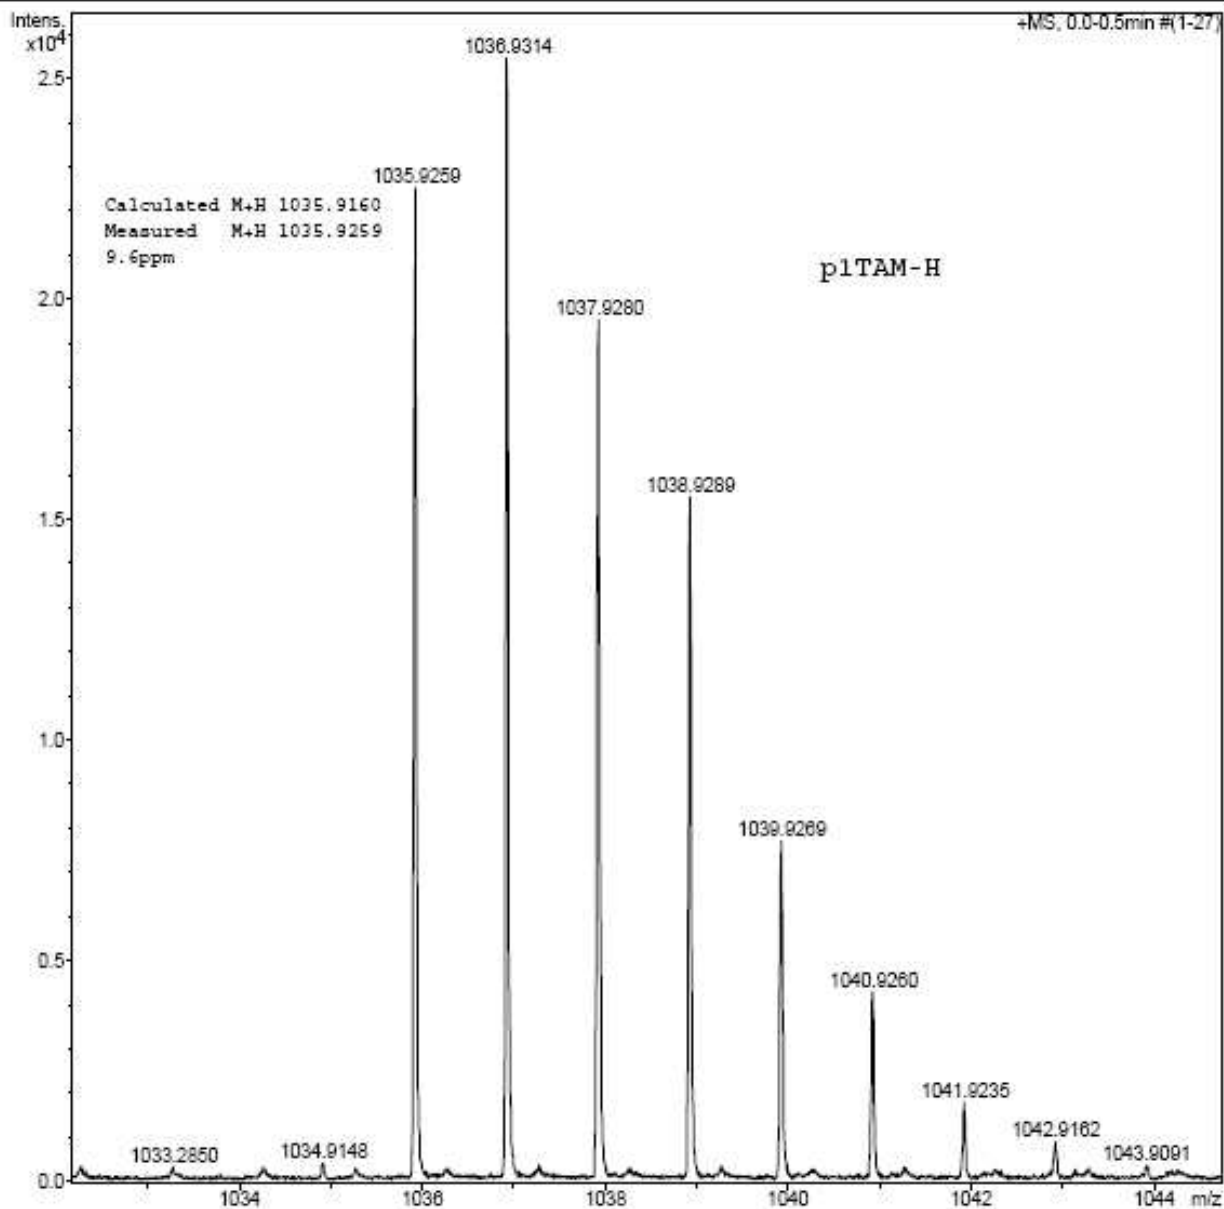

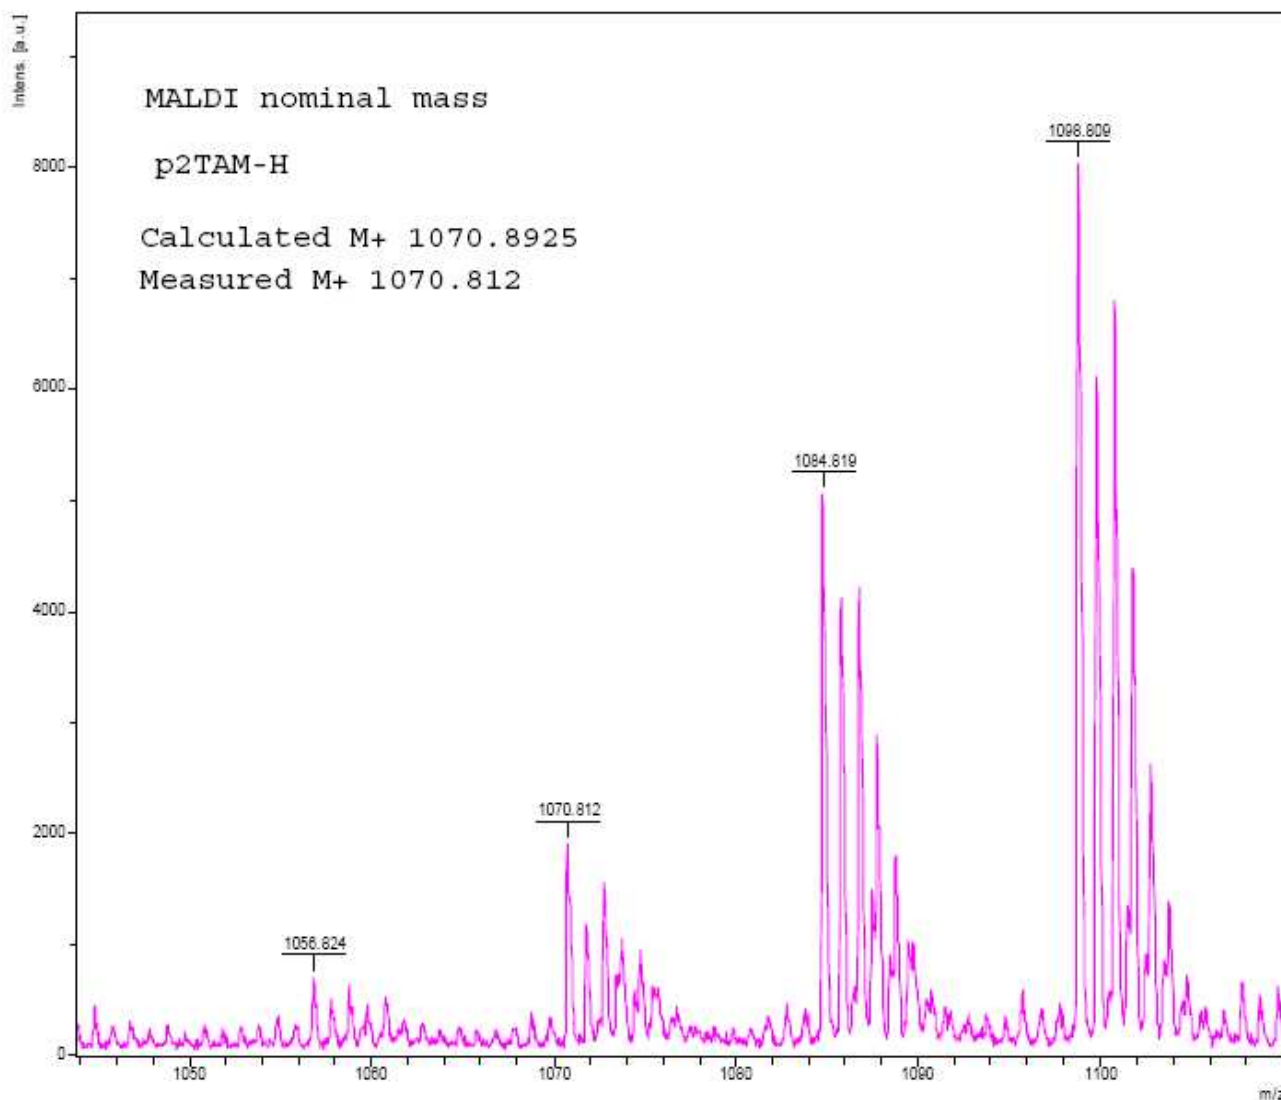

### Literature cited

1. Khramtsov, V. V.; Zweier, J. L., Functional in vivo EPR Spectroscopy and Imaging Using Nitroxide and Trityl Radicals. In *Stable Radicals: Fundamentals and Applied Aspects of Odd-Electron Compounds*, Hicks, R., Ed. John Wiley & Sons, Ltd.: Chichester, UK., 2010; pp 537-566.
2. Dhimitruka, I.; Velayutham, M.; Bobko, A. A.; Khramtsov, V. V.; Villamena, F. A.; Hadad, C. M.; Zweier, J. L., Large-scale synthesis of a persistent trityl radical for use in biomedical EPR applications and imaging. *Bioorg Med Chem Lett* **2007**, 17, (24), 6801-5.
3. Komarov, D. A.; Dhimitruka, I.; Kirilyuk, I. A.; Trofimov, D. G.; Grigor'ev, I. A.; Zweier, J. L.; Khramtsov, V. V., Electron paramagnetic resonance monitoring of ischemia-induced myocardial oxygen depletion and acidosis in isolated rat hearts using soluble paramagnetic probes. *Magn Reson Med* **2012**, doi: 10.1002/mrm.23251.
4. Hui, A. K.; Armstrong, B. H.; Wray, A. A., Rapid Computation of Voigt and Complex Error Functions. *Journal of Quantitative Spectroscopy & Radiative Transfer*. **1978**, 19, (5), 509-516.
5. Bobko, A. A.; Eubank, T. D.; Voorhees, J. L.; Efimova, O. V.; Kirilyuk, I. A.; Petryakov, S.; Trofimov, D. G.; Marsh, C. B.; Zweier, J. L.; Grigor'ev, I. A.; Samouilov, A.; Khramtsov, V. V., In vivo monitoring of pH, redox status, and glutathione using L-band EPR for assessment of therapeutic effectiveness in solid tumors. *Magn Reson Med* **2012**, 67, 1827-1836.
